# Supplementary material for: Appraisal of Hygiene Indicators and Farming Practices in the Production of Leafy Vegetables by Organic Small-Scale Farmers in uMbumbulu (Rural KwaZulu-Natal, South Africa)
Source: Int J Environ Res Public Health. 2013 Sep 13;10(9):4323–38. doi: 10.3390/ijerph10094323 (PMC3799505; doi:10.3390/ijerph10094323)
Supplement: Supplementary File 1 — Supplementary (PDF, 190 KB) [file ijerph-10-04323-s001.pdf]

**Investigation of Selected Hygiene Parameters of uMbumbulu Small-scale Farmers’  
Organic Produce (leafy salad vegetables) and Subsequent Identification of Factors  
Affecting Farmer Practices and Food Security**

**Questionnaire**

**Section 1- Demographics**

**1.1 Ubulili**

| <b>Ubulili</b>   | <b>X</b> |
|------------------|----------|
| Umuntu Wesilisa  |          |
| Umuntu wesfazane |          |

**1.2 Iminyaka**

| <b>Iminyaka</b> | <b>X</b> |
|-----------------|----------|
| a. 20<          |          |
| b. 21-39        |          |
| c. >40          |          |

**1.3 Izinga lemfundo**

| <b>Izinga</b>              | <b>X</b> |
|----------------------------|----------|
| a. Grade 7<                |          |
| b. Grade 8- Grade 12       |          |
| c. >Grade 12               |          |
| d. Angikaze ngiye eskoleni |          |

**1.4 Niyitholaphi imali**

| <b>Indawo</b>   | <b>Yebo</b> | <b>Cha</b> |
|-----------------|-------------|------------|
| a. Remittance   |             |            |
| b. Ukulima      |             |            |
| c. Social Grant |             |            |
| d. iMpesheni    |             |            |
| e. Uyasebenza   |             |            |
| f. Okunye       |             |            |

**1.5 Ingakanani imali uyenzayo ngokulima  
ngeviki uma uvunile?**

| <b>Imali (ZAR)</b> | <b>X</b> |
|--------------------|----------|
| a. 0-250           |          |
| b. 251-500         |          |
| c. 501-1000        |          |
| d. >1001           |          |

## **Section 2- Sub problem 1**

**Which vegetables are produced?**

**2.1 Kungani ukhethe ukulima ngendlela e organic? Khetha konke ovumelana nakho**

| <b>Isizatho</b>                         | <b>Yebo</b> | <b>Cha</b> |
|-----------------------------------------|-------------|------------|
| a. Abathengi bathanda lenhlobo yokulima |             |            |
| b. Iyonga imali                         |             |            |
| c. Iphatha imvelo kahle                 |             |            |
| d. Ukuthi umndeni udle                  |             |            |
| e. Okunye                               |             |            |

**2.2 Iziohi izithelo ozitshalayo?**

| <b>Isithelo</b> | <b>Yebo</b> | <b>Cha</b> | <b>Isithelo</b> | <b>Yebo</b> | <b>Cha</b> |
|-----------------|-------------|------------|-----------------|-------------|------------|
| a. Carrot       |             |            | f. Beetroot     |             |            |
| b. Green beans  |             |            | g. Onion        |             |            |
| c. Potato       |             |            | h. Lettuce      |             |            |
| d. Spinach      |             |            | i. Cabbage      |             |            |
| e. Tomato       |             |            | j. Swiss Chard  |             |            |

**Kungani utshala lezizithelo?**

---

---

---

**2.3 Uzidayisela Obani?**

---



---



---

2.4 Uyazidla lezizithelo ekhaya lakho? Y / C

2.5 Emva kokuzidla ekhaya, engabe uhleze uba nezithelo ezisalayo ukuze udayise? Y / C

### Section 3- Sub problem 2

What is the safety of the salad vegetables?

3.1 Engabe uyabusebenzisa ubulongwe bezilwane uma ulima? Y / C

3.2 Ubulongwe baziphi izilwane obusetshenziswayo? Tick all that apply

|    | Animals   | Yebo | Cha |
|----|-----------|------|-----|
| a. | Izinkukhu |      |     |
| b. | Izimbuzi  |      |     |
| c. | Izinkomo  |      |     |
| d. | Okunye    |      |     |

3.3 Engabe ubuthathaphi lobubulongwe?

---



---

3.4 Kungani kusetshenziswa lobubulongwe?

---



---



---

**3.5 Engabe yini oyenzayo kulobubulongwe ukuze kugcine buyi compost? Chaza kabanzi**

---

---

**3.6 Le compost isetshenziswa kanjani ensimini? Chaza kabanzi**

---

---

---

**3.7 Inani lecompost osetshenziswayo likalwa yini? Y / C**

**Uma uvumelani, kanjani?**

---

---

**3.8 Aqhamukaphi amanzi okuchela?**

| Source                                                       | Yebo | Cha |
|--------------------------------------------------------------|------|-----|
| a. Amanzi kampompi                                           |      |     |
| b. Amanzi ethanki                                            |      |     |
| c. umfula/borehole/stream/wetland<br>(natural water sources) |      |     |
| d. Other (isphethu)                                          |      |     |

**3.9 Engabe lawamanzi ayahlanzwa ngendlela ethize? Khetha okukodwa**

| Process                               | X |
|---------------------------------------|---|
| a. Yebo, ayahlanzwa                   |   |
| b. Cha, kuchelelwa ngawo engahlanziwe |   |
| c. Okunye                             |   |

**3.10 Uma uphendule ngo (a) ahlanzwa kanjani?**

---

---

---

**3.11 Ikuphi okwenzayo phakathi kwalokhu okulandelayo ukuqiniseka ukuthi uhlanzekile? Khetha konke ovumelana nakho**

| Process                                 | Yebo | Cha |
|-----------------------------------------|------|-----|
| a. Ngigeza ama bhuzu/ amadadla          |      |     |
| b. Ngiwasha onke ama thuluzi            |      |     |
| c. Angenzi lutho, ngiya ensimini nginje |      |     |
| d. Okunye                               |      |     |

**3.12 Uma uvuna, kukhona izitshalo ezihuzukayo noma ezilimalayo? Y / C**

**3.13 Uzenzenjani izitshalo ezihuzukile noma ezilimele?**

| Procedure                               | Yebo | Cha |
|-----------------------------------------|------|-----|
| a. Uzidayisela omakhelwane              |      |     |
| b. Ziyadayiswa, kodwa ngenani eliphansi |      |     |
| c. Ziyahlwa                             |      |     |
| d. Zisetshenziswa ekhaya                |      |     |
| e. Okunye                               |      |     |

**3.14 Engabe izitshalo zakho ziyahashazwa emanzini ngaphambi kokupakishwa? Y / C**

**Uma kunjalo, engabe zihashazwa ngamanzi ochelelwa ngawo? Y / C**

### **Section 4- Sub Problem 3**

**Which areas require capacity building in microbial safety?**

#### **4.1 Usuke wafundiswa ngokutshalwa organically? Y / C**

**Uma kunjalo khetha it raining programme. Khetha konke ovumelana nakho**

| <b>Programme</b>                                                | <b>Yebo</b> | <b>Cha</b> |
|-----------------------------------------------------------------|-------------|------------|
| a. Composting (ukwenza umquba)                                  |             |            |
| b. Post-harvest protocol (ukuphatwa kwezitshalo emva kokuvuna)  |             |            |
| c. Water safety (okuhlazeka kwamanzi)                           |             |            |
| d. Types of sustainable agriculture (izinhlobo zolimi lwenvelo) |             |            |
| e. Good personal hygiene practices (ukuhlazeka komuntu)         |             |            |
| f. Pest control (ukubulala izinambuzane)                        |             |            |
| g. Soil management (ukunakekelwa komhlathi)                     |             |            |
| h. Soil preparation (ukulungisa umhlathi)                       |             |            |
| i. Okunye                                                       |             |            |

#### **4.2 Uba owaye fundisa?**

| <b>Trainer</b>     | <b>Yebo</b> | <b>Cha</b> |
|--------------------|-------------|------------|
| a. Government      |             |            |
| b. Private company |             |            |
| c. NGO             |             |            |
| d. Okunye          |             |            |

**4.3 Ngolwakho ulwazi, ikuphi phakathi kwalokhu okulandelayo okungaba isisusa samagcikwane?**

**Tick all that apply**

| Source               | Yebo | Cha |
|----------------------|------|-----|
| a. Water             |      |     |
| b. Soil              |      |     |
| c. Tools(amathuluzi) |      |     |
| d. Compost           |      |     |
| e. Other             |      |     |
| f. Don't know        |      |     |

**4.4 Iziphi izizathu ezenza lokhu okukhethile isisusa samagcikwane?**

---

---

---

**4.5 Ngowakho umbono ikuphi okulandelayo okungadala ukuthi izitshalo zigcine zinamagcikwane?**

**Khetha konke ovumelana nakho**

| Practice                                  | Yebo | Cha |
|-------------------------------------------|------|-----|
| a. Ukusetshenziswa kwamanzi anamagcikwane |      |     |
| b. Icompost engenziwanga kahle            |      |     |
| c. Ukungahlanzekio yomuntu                |      |     |
| d. Umhlabathi onamagcikwane               |      |     |
| e. Amathuluzi anamagcikwane               |      |     |
| f. Don't know                             |      |     |

**4.6 Ibuphi ubungozi obungadaleka uma izitshalo ezinamagcikwane zithengiswa? Khetha konke ovumelana nakho**

| Potential Hazard                   | Yebo | Cha |
|------------------------------------|------|-----|
| a. Ukuguliswa amagcikwane          |      |     |
| b. Abukho ubungozi                 |      |     |
| c. Angeke uthembeke kumakhasimende |      |     |
| d. Other                           |      |     |
| e. Don't know                      |      |     |

**4.7 Zikhona izifo ozaziyo ezihlangene nezitshalo ezikezahlasela umphakathi emphakathini? Y / N**

**4.8 Ngokwakho ukwazi engabe kukhona ukuqwashiswa ngokwanele ngokuphepha kwezitshalo emphakathini? Y / N**

**Uma kungenjalo yini engenziwa?**

---



---



---

**4.9 Iyiphi itrainig ocabanga ukuthi uyayidinga ephathelene namagcikwane ezitshalweni? Chaza kabanzi**

---



---



---

**Investigation of Selected Hygiene Parameters of uMbumbulu Small-scale Farmers’  
Organic Produce (leafy salad vegetables) and Subsequent Identification of Factors  
Affecting Farmer Practices and Food Security**

**Questionnaire**

**Section 1- Demographics**

**1.1 Gender**

| Gender | X |
|--------|---|
| Male   |   |
| Female |   |

**1.2 Age**

| Age      | X |
|----------|---|
| a. 20<   |   |
| b. 21-39 |   |
| c. >40   |   |

**1.3 Level of education**

| Level                  | X |
|------------------------|---|
| a. Grade 7<            |   |
| b. Grade 8- Grade 12   |   |
| c. >Grade 12           |   |
| d. No formal education |   |

**1.4 Sources of income: Tick all that apply**

| Source                   | Yes | No |
|--------------------------|-----|----|
| a. Remittance            |     |    |
| b. Farming               |     |    |
| c. Social Grant          |     |    |
| d. Pension               |     |    |
| e. Salaried<br>Job/Wages |     |    |
| f. Other                 |     |    |

**1.5 How much do you make from organic farming weekly during harvest time?**

| Amount (ZAR) | X |
|--------------|---|
| a. 0-250     |   |
| b. 251-500   |   |
| c. 501-1000  |   |
| d. >1001     |   |

## **Section 2- Sub problem 1**

**Which vegetables are produced?**

**2.1 Why do you practice organic farming? Tick all that apply**

| <b>Reason</b>                       | <b>Yes</b> | <b>No</b> |
|-------------------------------------|------------|-----------|
| a. Market demand of organic produce |            |           |
| b. Cost effective                   |            |           |
| c. Its gentle on the environment    |            |           |
| d. To ensure food security          |            |           |
| e. Other                            |            |           |

**2.2 Which vegetables do you plant?**

| <b>Vegetable</b> | <b>Yes</b> | <b>No</b> | <b>Vegetable</b> | <b>Yes</b> | <b>No</b> |
|------------------|------------|-----------|------------------|------------|-----------|
| a. Carrot        |            |           | f. Beetroot      |            |           |
| b. Green beans   |            |           | g. Onion         |            |           |
| c. Potato        |            |           | h. Lettuce       |            |           |
| d. Spinach       |            |           | i. Cabbage       |            |           |
| e. Tomato        |            |           | j. Swiss Chard   |            |           |

**Why do you plant these vegetables?**

---

---

---

**2.3 Who do you mainly supply?**

---

---

---

2.4 Do you use the products yourself? Y / N

2.5 Do you always have a surplus to sell? Y / N

**Section 3- Sub problem 2**

**What is the safety of the salad vegetables?**

3.1 Do you use animal manure in your farming activities? Y / N

3.2 Which type of waste is used? Tick all that apply

|    | Animals | Yes | No |
|----|---------|-----|----|
| a. | Chicken |     |    |
| b. | Sheep   |     |    |
| c. | Cow     |     |    |
| d. | Other   |     |    |

3.3 Where do you get it from?

3.4 Why is this type of waste used?

3.5 How do you prepare the animal manure? Please explain.

### 3.6 How is this manure/compost used in the plot? Please explain

**3.7 Is the quantity of the manure/ compost used measured in any way? Y / N**

**If yes, how?**

### 3.8 What is the source of irrigation water?

**3.9 Is the water used for irrigation treated? Please tick most relevant answer**

Page 4 of 8

**3.10 In the case of (a) how is this water treated?**

---

---

---

**3.11 Do you adhere to any of the following with regards to personal hygiene before going to the garden? Tick all that apply**

| Process                          | Yes | No |
|----------------------------------|-----|----|
| a. Wash your hands and gum boots |     |    |
| b. Wash all equipment required   |     |    |
| c. Go to the garden as you are   |     |    |
| d. Other                         |     |    |

**3.12 When harvesting, are there vegetables which are bruised or damaged? Y / N**

**3.13 What do you do with the bruised or damaged vegetables?**

| Procedure                                 | Yes | No |
|-------------------------------------------|-----|----|
| a. Sold to neighbours                     |     |    |
| b. Sold to market but at a discount price |     |    |
| c. Discarded                              |     |    |
| d. Taken for personal use                 |     |    |
| e. Other                                  |     |    |

**3.14 Are vegetables rinsed before packaging for the market? Y / N**

**If yes, are they rinsed with the same water used for irrigation? Y / N**

### **Section 4- Sub Problem 3**

**Which areas require capacity building in microbial safety?**

**4.1 Have you received any form of training in organic farming? Y / N**

**If yes, please name training program. Tick all that apply**

| <b>Programme</b>                    | <b>Yes</b> | <b>No</b> |
|-------------------------------------|------------|-----------|
| a. Composting                       |            |           |
| b. Post-harvest protocol            |            |           |
| c. Water safety                     |            |           |
| d. Types of sustainable agriculture |            |           |
| e. Good personal hygiene practices  |            |           |
| f. Pest control                     |            |           |
| g. Soil management                  |            |           |
| h. Soil preparation                 |            |           |
| i. Other                            |            |           |

**4.2 Who provided the training?**

| <b>Trainer</b>     | <b>Yes</b> | <b>No</b> |
|--------------------|------------|-----------|
| a. Government      |            |           |
| b. Private company |            |           |
| c. NGO             |            |           |
| d. Other           |            |           |

**4.3 According to your knowledge, which of the following can be a source of bacterial contamination? Tick all that apply**

| Source        | Yes | No |
|---------------|-----|----|
| a. Water      |     |    |
| b. Soil       |     |    |
| c. Tools      |     |    |
| d. Compost    |     |    |
| e. Other      |     |    |
| f. Don't know |     |    |

**4.4 Why are these possible sources of contamination?**

---



---



---

**4.5 In your opinion, which of the following practices can compromise the microbial safety of produce? Tick all that apply**

| Practice                      | Yes | No |
|-------------------------------|-----|----|
| a. Use of contaminated water  |     |    |
| b. Poor composting techniques |     |    |
| c. Poor personal hygiene      |     |    |
| d. Contaminated soils         |     |    |
| e. Contaminated equipment     |     |    |
| f. Don't know                 |     |    |
| g. Other                      |     |    |

4.6 What potential hazards may this have on the market? Tick all that apply

| Potential Hazard           | Yes | No |
|----------------------------|-----|----|
| a. Bacterial outbreaks     |     |    |
| b. No hazards              |     |    |
| c. Lose trust of customers |     |    |
| d. Other                   |     |    |
| e. Don't know              |     |    |

4.7 Do you have any knowledge of outbreaks/sickness linked to harvested fresh produce in your community? Y / N

4.8 According to your knowledge, is there enough awareness about produce safety in your community? Y / N

If no, what do you think should be done to improve awareness?

4.9 What training related to safety of vegetables do you think you need? Please explain
